# Supplementary material
Source: PubMed Central journal article supplement (PMC9700520)

**Supplemental Figure. Oxygen Consumption in 8 week old Cardiomyocyte Mitochondria.** (A) Representative tracings for Complex II-dependent oxygen consumption in mitochondria with or without propofol. Numbers following addition of adenosine diphosphate (ADP), oligomycin (oligo), and dinitrophenol (DNP) indicate rates of oxygen consumption ( $\text{nmol}\cdot\text{mL}^{-1}\cdot\text{min}^{-1}\cdot\text{mg}$  mitochondrial protein $^{-1}$ ). Graphical representations of (B) Complex I-dependent oxygen consumption using glutamate/malate and (C) Complex II-dependent oxygen consumption using succinate are shown ( $n = 3-4$  per exposure cohort). Rates of state 2 respiration (following addition of substrate), state 3 respiration (following addition of ADP), state 4 respiration, uncoupled state 3 respiration (state 3 DNP), and oligomycin-induced state 4 (state 4 oligo) are indicated. Graphical depiction of respiratory control ratios (RCR) and DNP-to-oligomycin ratios (DNP:oligo) are also shown. Values are expressed as means  $\pm$  SD.  $p$  values were calculated by one-way ANOVA. \* $p < 0.05$ , † $p < 0.01$ , ‡ $p < 0.001$ .

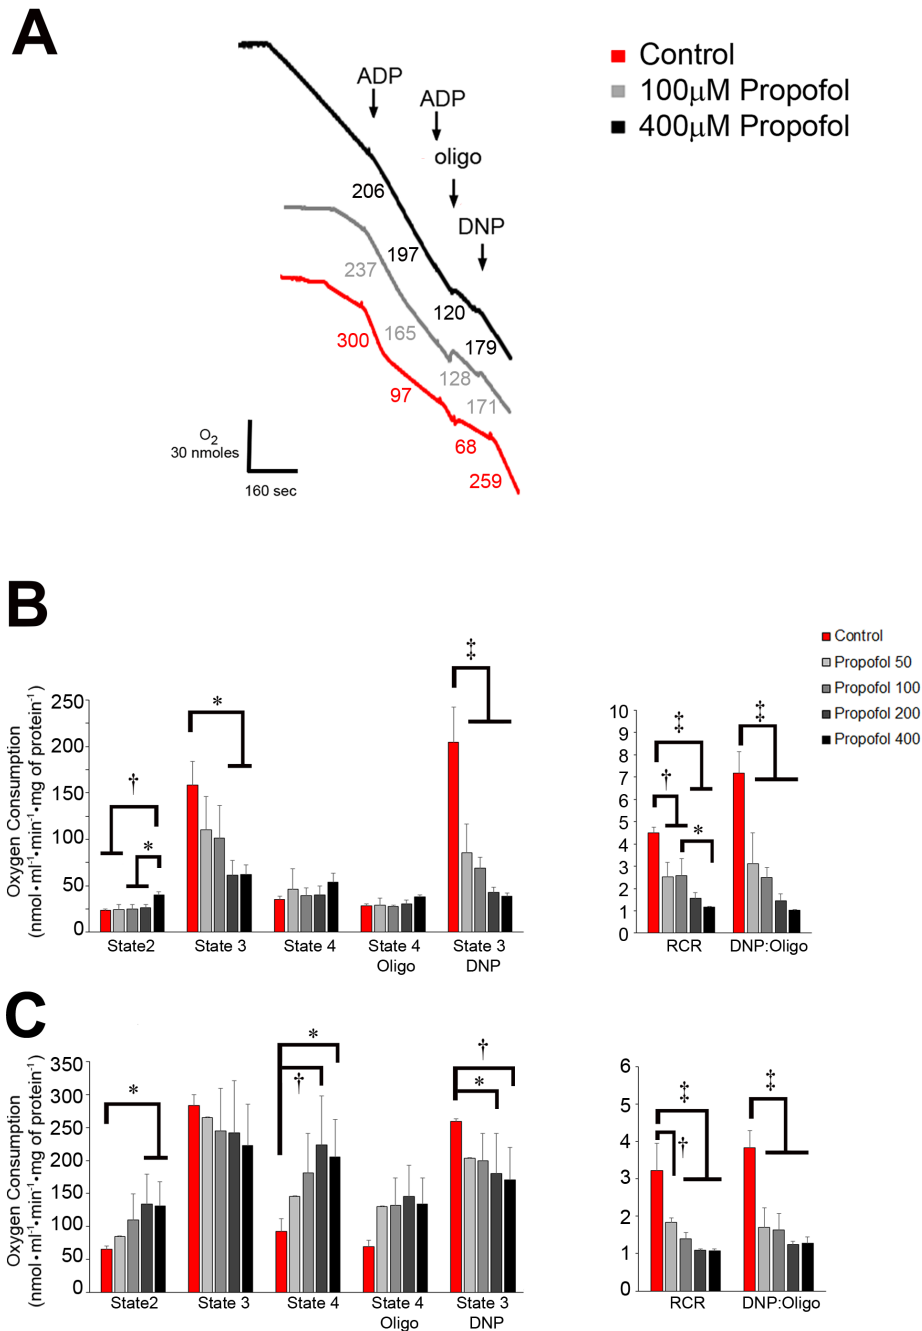

Supplement: 41390_2022_1985_MOESM1_ESM.pdf [file 41390_2022_1985_MOESM1_ESM.pdf]
